# Supplementary material for: First-principles study of NaxTiO2 with trigonal bipyramid structures: an insight into sodium-ion battery anode applications
Source: Royal Society of Chemistry journal article supplement (doi:10.1039/c9cp00267g), 2019-01-01
Supplement: c9cp00267g1.pdf [file c9cp00267g1.pdf]

# Supplementary information – First-principles study of $\text{Na}_x\text{TiO}_2$ with trigonal bipyramid structures: An insight into sodium-ion battery anode application

Song-Hyok Choe<sup>a,b</sup>, Chol-Jun Yu<sup>a\*</sup>, Kum-Chol Ri<sup>a</sup>, Jin-Song Kim<sup>a</sup>,  
Un-Gi Jong<sup>a,b</sup>, Yun-Hyok Kye<sup>a,b</sup> and Song-Nam Hong<sup>a</sup>

<sup>a</sup>Chair of Computational Materials Design, Faculty of Materials Science, Kim Il Sung University,  
Ryongnam-Dong, Taesong District, Pyongyang, Democratic People's Republic of Korea

<sup>b</sup>Natural Science Centre, Kim Il Sung University, Ryongnam-Dong,  
Taesong District, Pyongyang, Democratic People's Republic of Korea

## $\text{TiO}_2$ crystalline structures in trigonal bipyramid phases

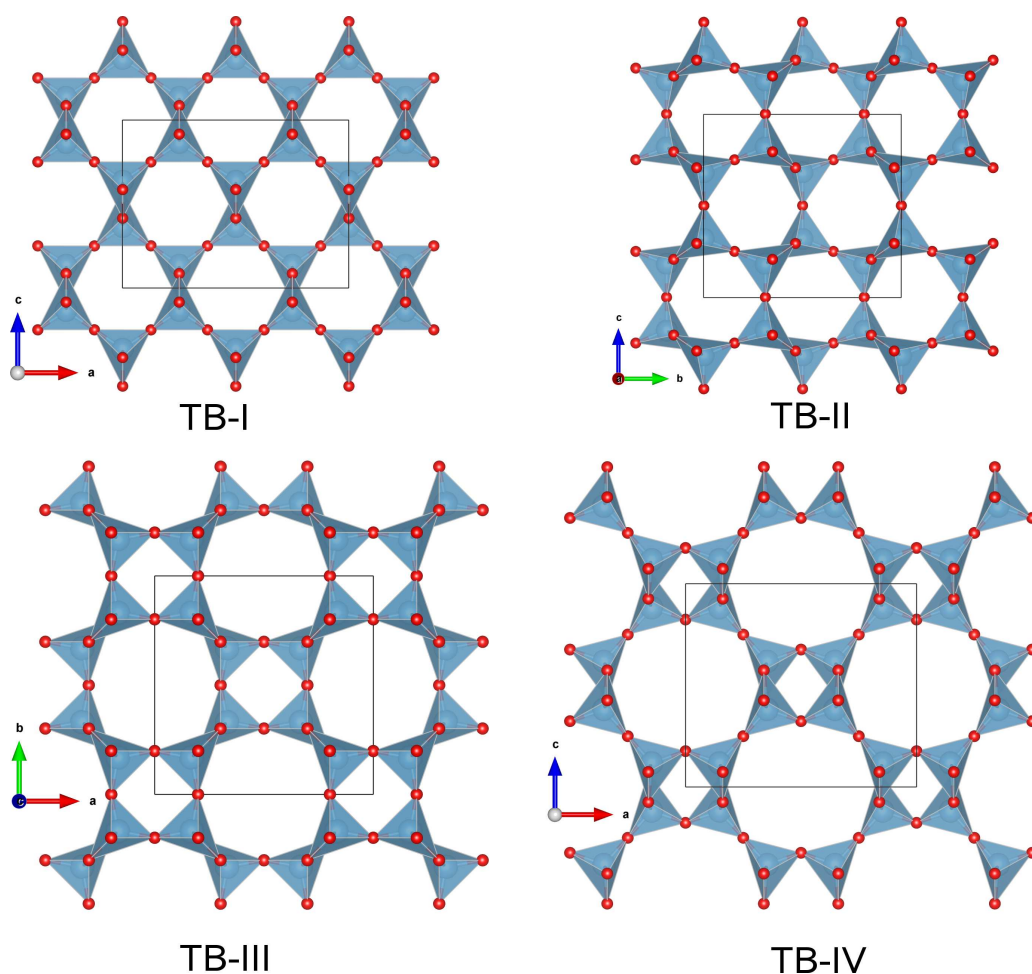

Figure S1. Crystalline structures of  $\text{TiO}_2$  with four different trigonal bipyramid (TB) phases.

\*Corresponding author: Chol-Jun Yu, Email: cj.yu@ryongnamsan.edu.kp

## Bond valence sum

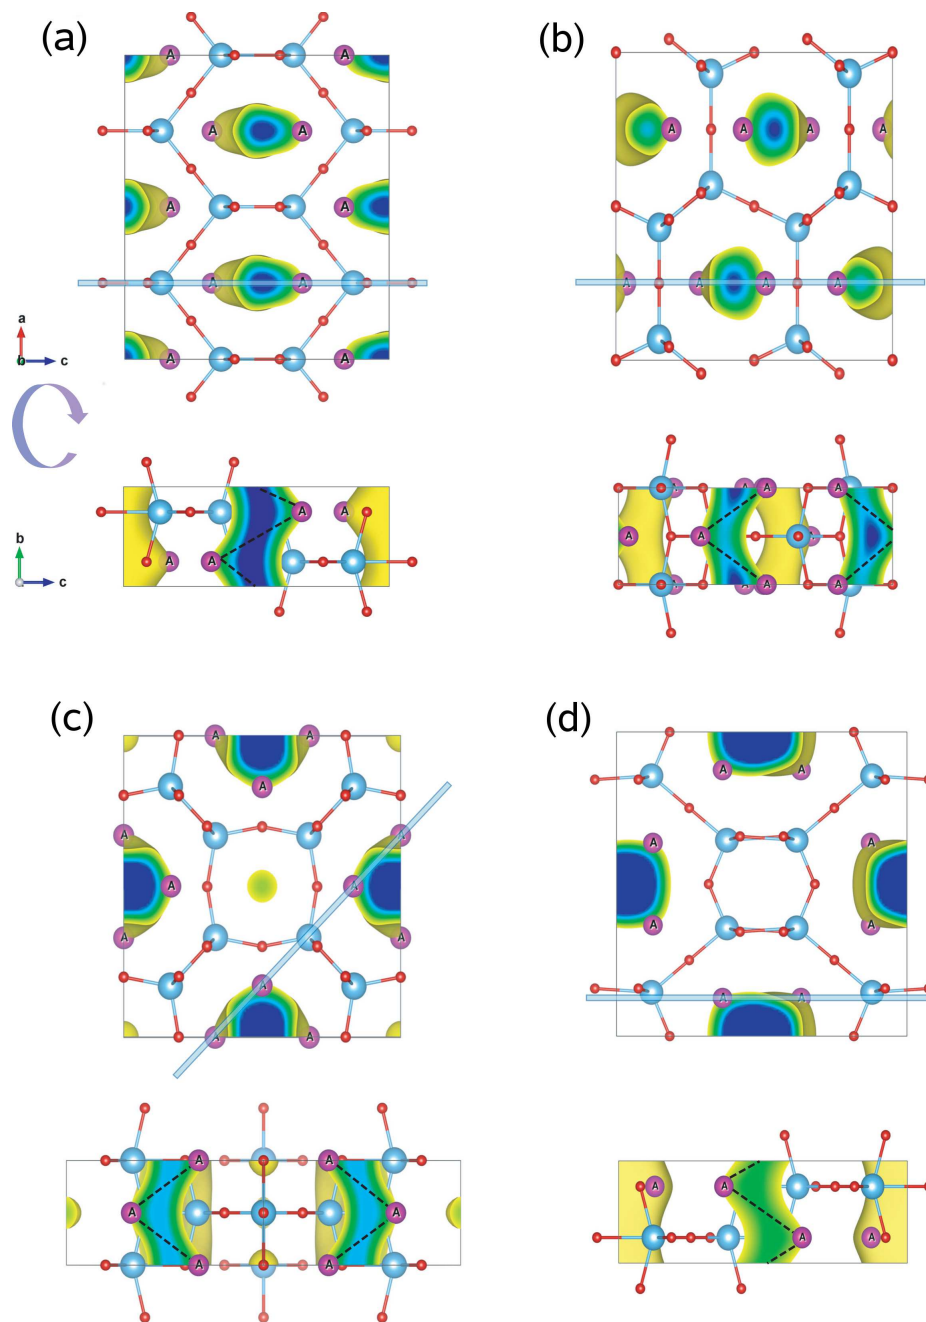

Figure S2. Isosurface view of bond valence sum (BVS) of  $\text{TiO}_2$  for Na insertion into (a) TB-I, (b) TB-II, (c) TB-III and (d) TB-IV phases, projected onto  $a$ - $c$  (top) and  $b$ - $c$  (bottom) planes. Blue and red balls represent Ti and O atoms respectively, and yellow balls with A label denote  $\text{Na}^+$  cation insertion sites. In bottom figures, ion migration paths are denoted as dashed lines.

## Structural properties and sodium binding energies

Table S1. Lattice constants  $a$ ,  $b$  and  $c$  (Å), relative volume expansion rate  $r_{\text{vol}} = (V_x - V_0)/V_0 \times 100\%$ , and sodium binding energy  $E_b$  (eV) in  $\text{Na}_x\text{TiO}_2$  compounds in TB-III and -IV phases, calculated with the PBEsol functional.

| $x$                                | $a$   | $b$  | $c$   | $r_{\text{vol}}$ (%) | $E_b$ |
|------------------------------------|-------|------|-------|----------------------|-------|
| $\text{Na}_x\text{TiO}_2$ (TB-III) |       |      |       |                      |       |
| 0.0                                | 10.54 | 3.77 | 10.54 | –                    | –     |
| 0.125                              | 10.27 | 3.82 | 10.44 | –2.27                | –2.21 |
| 0.25                               | 10.18 | 3.84 | 10.27 | –4.16                | –2.03 |
| 0.375                              | 10.07 | 3.88 | 10.27 | –4.10                | –1.99 |
| 0.5                                | 10.23 | 3.91 | 10.10 | –3.58                | –1.89 |
| 0.625                              | 10.38 | 3.94 | 10.25 | –0.13                | –1.70 |
| 0.75                               | 10.88 | 3.89 | 10.53 | 6.40                 | –1.61 |
| 0.875                              | 10.77 | 3.94 | 10.61 | 7.51                 | –1.59 |
| 1.0                                | 10.71 | 3.98 | 10.72 | 9.10                 | –1.58 |
| $\text{Na}_x\text{TiO}_2$ (TB-IV)  |       |      |       |                      |       |
| 0.0                                | 11.64 | 3.75 | 10.25 | –                    | –     |
| 0.125                              | 11.66 | 3.80 | 10.13 | 0.48                 | –2.10 |
| 0.25                               | 11.69 | 3.85 | 10.03 | 0.95                 | –2.04 |
| 0.375                              | 11.15 | 3.86 | 10.55 | 1.43                 | –1.90 |
| 0.5                                | 10.77 | 3.87 | 10.77 | 0.33                 | –1.86 |
| 0.625                              | 11.56 | 3.95 | 9.98  | 1.78                 | –1.76 |
| 0.75                               | 11.73 | 3.98 | 9.82  | 2.41                 | –1.76 |
| 0.875                              | 11.60 | 3.98 | 10.01 | 3.25                 | –1.70 |
| 1.0                                | 11.56 | 3.98 | 10.08 | 3.73                 | –1.66 |

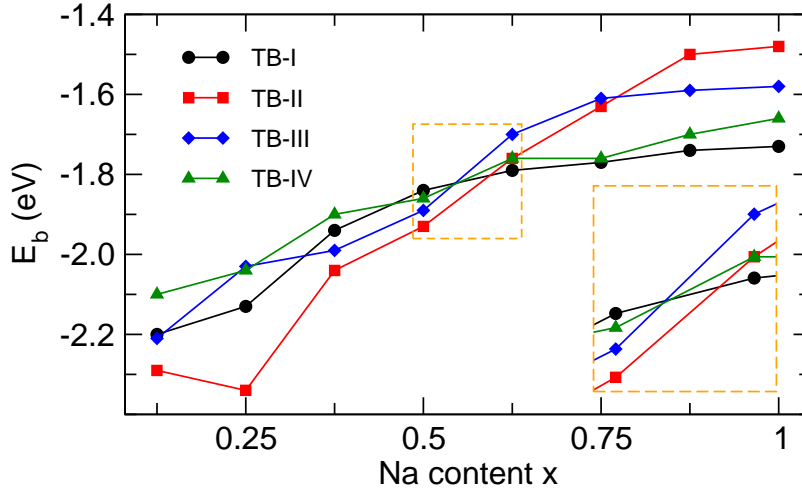

Figure S3. Binding energies of Na atom in  $\text{Na}_x\text{TiO}_2$  compounds with TB phases as functions of Na content  $x$ .

## Activation energies for Na ion migrations

Table S2. Activation energies ( $E_a$ ) for Na ion migrations in  $\text{Na}_x\text{TiO}_2$  compounds at different Na content  $x$  with different TB phases.

| $x$   | $E_a$ (eV) |       |        |       |
|-------|------------|-------|--------|-------|
|       | TB-I       | TB-II | TB-III | TB-IV |
| 0.125 | 0.17       | 0.19  | 0.23   | 0.58  |
| 0.25  | 0.21       | –     | –      | –     |
| 0.375 | 0.19       | –     | –      | –     |
| 0.5   | 0.34       | 0.46  | 0.25   | 0.46  |
| 0.625 | 0.63       | –     | –      | –     |
| 0.75  | 0.60       | –     | –      | –     |
| 0.875 | 0.53       | 0.26  | 0.30   | 0.65  |

## Electronic density difference

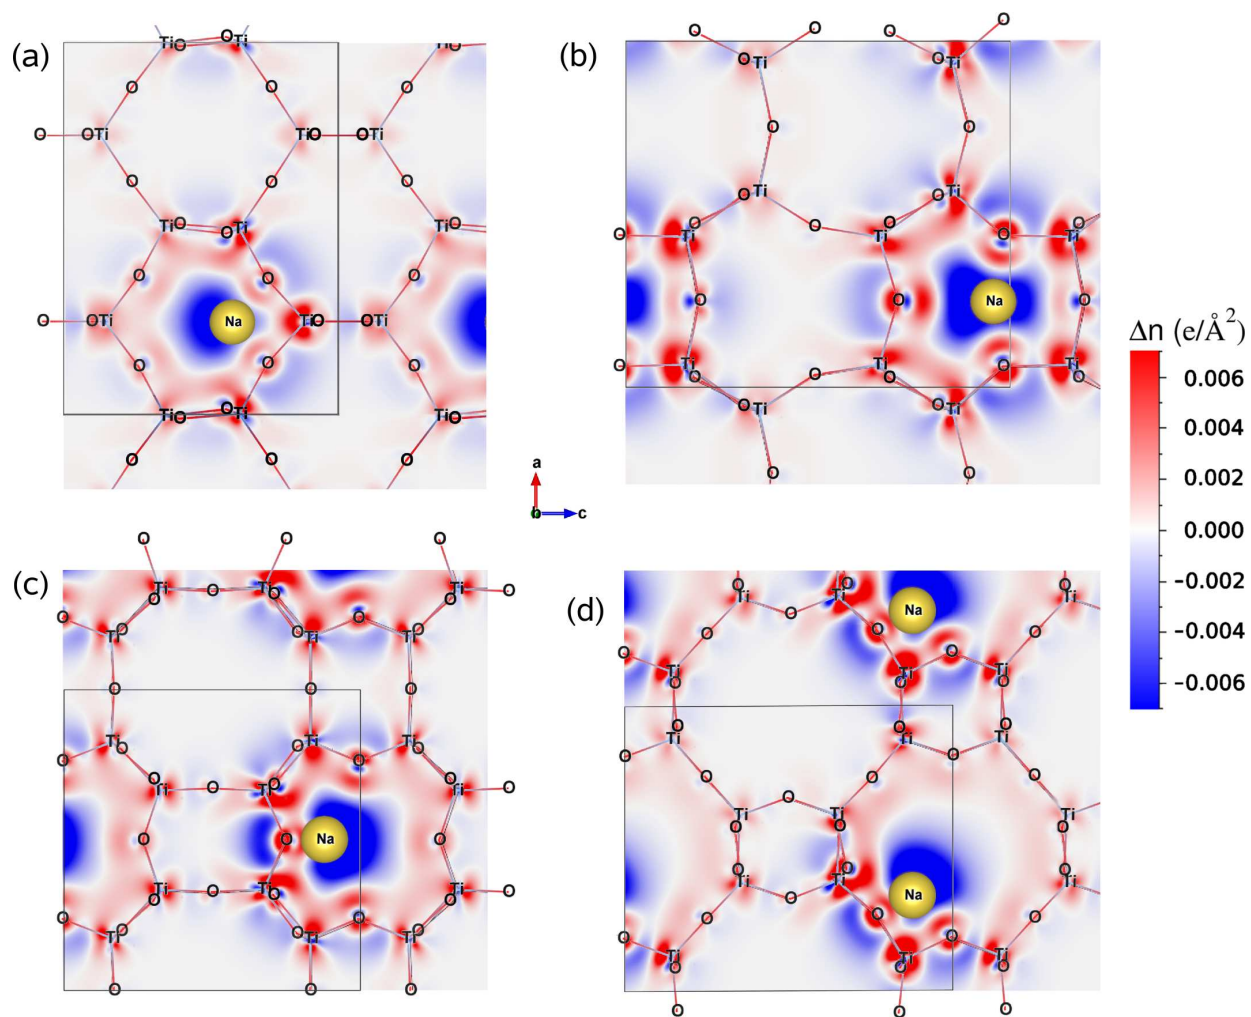

Figure S4. Electronic charge density difference integrated over  $b$ -axis in a) TB-I, b) TB-II, c) TB-III and d) TB-IV phases with  $x = 0.125$ . Positive (red) and negative (blue) values indicate the electron gain and loss, respectively.
